# Supplementary material
Source: publisher figshare collection journal article supplement (https://acs.figshare.com/ndownloader/files/4436119)
Supplement: Supplementary file 1 [file 4436119]

# Controlled Assembly of Hydrogenase-CdTe Nanocrystal Hybrids for Solar Hydrogen Production

Katherine A. Brown,<sup>†</sup> Smita Dayal,<sup>‡</sup> Xin Ai,<sup>‡</sup> Garry Rumbles,<sup>‡</sup> and Paul W. King\*,<sup>†</sup>

*Biosciences Center and Chemical and Material Sciences Center, National Renewable Energy  
Laboratory, Golden, Colorado 80401*

## Supporting Information

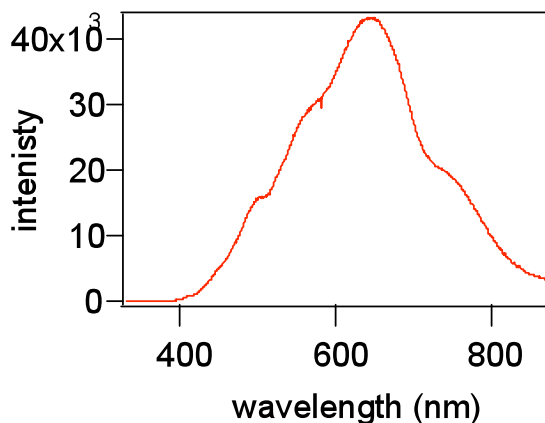

**Figure S1.** Emission spectrum of the white light illumination source.

Use of the Langmuir isotherm (and kinetic models)<sup>1, 2</sup> is common for nanocrystals. It has been used for gold NC's and DNA in particular.<sup>3</sup> Though the theory was originally derived for adsorption of gases to planar surfaces, its' use is not restricted to large surfaces, as the derivation concerns free surface cites, and the derivation does not include any assumptions about the relative number of surface sites vs. adsorbing molecules. The assumptions that are used in the derivation are:

1. Adsorption cannot proceed beyond a monolayer of coverage.
2. All surface sites are equivalent and can accommodate, at most, one adsorbed atom.
3. The ability of a molecule to adsorb at a given site is independent of the occupation of neighboring sites.

The third assumption only holds for small gas phase molecules for which this equation was originally designed, but the equation is still considered useful for molecules in solution phase. This theory is preferable to protein-protein or protein-ligand models as they are designed to analyze transient adsorption complexes, rather than stable interactions.

**Table S1.** Fitted values for  $k_{\text{OBS}}$  and  $\Delta I_{\text{max}}$ .

| H <sub>2</sub> ase (uM) | $k_{\text{OBS}}$ (sec <sup>-1</sup> ) | Error (95%) | $\Delta I_{\text{max}}$ | Error (95%) |
|-------------------------|---------------------------------------|-------------|-------------------------|-------------|
| 3.74                    | 0.00284                               | 0.000087    | 314990                  | 3350        |
| 2.80                    | 0.00224                               | 0.000058    | 296540                  | 3130        |
| 1.87                    | 0.00199                               | 0.000053    | 229190                  | 2730        |
| 0.75                    | 0.00150                               | 0.000051    | 192220                  | 3430        |
| 0.38                    | 0.00133                               | 0.000047    | 132600                  | 2630        |

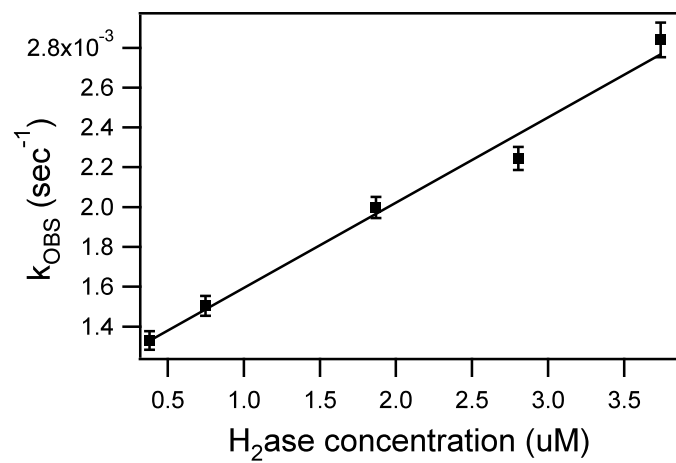

**Figure S2.** Plot of  $k_{\text{OBS}}$  vs.  $\text{H}_2\text{ase concentration}$ . Black line represents linear fit.

### Derivation of eq. 8.

By definition

$$PLQE_{CdTe} = \frac{k_{RR}}{k_{RR} + k_{NR} + k_{ST}[T]}$$

Where [T] is the concentration of surface trap states in the nanocrystal.

For the samples containing inactive enzyme:

$$PLQE_{(I)} = \frac{k_{RR}}{k_{RR} + k_{NR} + k_{ST}[T']}$$

For the samples containing active enzyme

$$PLQE_{(A)} = \frac{k_{RR}}{k_{RR} + k_{NR} + k_{ST}[T'] + k_{ET}[H_2ase]}$$

Where [T'] is the concentration of trap states after adsorption of the H<sub>2</sub>ase.

For a given detector/light source, PLQE  $\propto$  Emission Peak Area

So...

$$\frac{PLQE_{(I)}}{PLQE_{(A)}} = \frac{Area_{IA}}{Area_A} = \frac{k_{RR}(k_{RR} + k_{NR} + k_{ST}[T'] + k_{ET}[H_2ase])}{k_{RR}(k_{RR} + k_{NR} + k_{ST}[T'])}$$

$$\frac{Area_{(I)}}{Area_{(A)}} = \frac{k_{RR} + k_{NR} + k_{ST}[T']}{k_{RR} + k_{NR} + k_{ST}[T']} + \frac{k_{ET}[H_2ase]}{k_{RR} + k_{NR} + k_{ST}[T']}$$

$$\frac{Area_{(I)}}{Area_{(A)}} = 1 + \frac{k_{ET}[H_2ase]}{k_{RR} + k_{NR} + k_{ST}[T']}$$

Substituting:

$$k_{RR} + k_{NR} + k_{ST}[T'] = \frac{k_{RR}}{PLQE_{(I)}}$$

Gives the expression:

$$\frac{Area_{(I)}}{Area_{(A)}} = 1 + \frac{k_{ET}}{k_{RR}} * [H_2ase] * PLQE_{(I)}$$

$$\frac{k_{ET}}{k_{RR}} = \left( \frac{Area_{(I)}}{Area_{(A)}} - 1 \right) \frac{1}{[H_2ase] * PLQE_{(I)}}$$

However  $PLQE_{(I)}$  is a function of  $H_2ase$  concentration:

$$PLQE_{(I)} = PLQE_{CdTe} * \frac{Area_{(I)}}{Area_{CdTe}} = PLQE_{H_2ase}$$

Where  $PLQE_{H_2ase}$  is the PLQE of nc-CdTe- $H_2ase$  for a specific  $[H_2ase]$ , and  $PLQE_{CdTe}$  is the measured PLQE value of CdTe alone (17.5%).

This gives the final expression for eq. 8:

$$\frac{k_{ET}}{k_{RR}} = \left( \frac{Area_{(I)}}{Area_{(A)}} - 1 \right) \frac{1}{[H_2ase] * PLQE_{H_2ase}}$$

## References:

1. Karpovich, D. S.; Blanchard, G. J., *Langmuir* **1994**, *10*, 3315-3322.
2. Langmuir, I., *J. Am. Chem. Soc.* **1918**, *40*, 1361.
3. Brown, K. A.; Park, S.; Hamad-Schifferli, K., *J. Phys. Chem. C* **2008**, *112*, 7517-7521.
